# Supplementary material for: A facile method to construct dual-responsive organogels with color changes
Source: Royal Society of Chemistry journal article supplement (doi:10.1039/c3ra43242d), 2013-01-01
Supplement: c3ra43242d.pdf [file c3ra43242d.pdf]

## Facile way to construct dual-responsive organogels with color changes

Feifei Xin,<sup>a</sup> Shangyang Li,<sup>a</sup> Yuehui Hou,<sup>a</sup> Pengyao Xing,<sup>a</sup> Aiyu Hao<sup>\*a</sup>

School of Chemistry and Chemical Engineering and Key Laboratory of Colloid and Interface Chemistry of Ministry of Education, Shandong University, Jinan 250100, PR China

E-mail: [haoay@sdu.edu.cn](mailto:haoay@sdu.edu.cn)

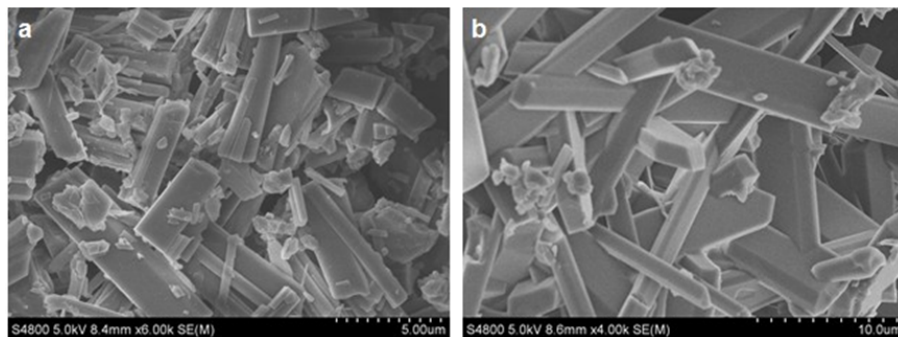

**Fig. S1** SEM images of xerogels prepared from various organogels: (a) bluegel; (b) gel (II) ( $C_{\beta\text{-CD}} = 0.167$  mol/L,  $C_{\text{TP}} = 0.084$  mol/L).
